# Supplementary material
Source: PubMed Central journal article supplement (PMC9900600)
Supplement: NIHMS1864793-supplement-1.pdf [file NIHMS1864793-supplement-1.pdf]

Supplemental Table. Effects of Time on Alcohol-Related and Quality of Life Outcomes by AUD-Treatment Status

|                   | A. Problematic Drinking          |                  | B. Alcohol Craving            |                  | C. Physical Quality of Life    |                  |
|-------------------|----------------------------------|------------------|-------------------------------|------------------|--------------------------------|------------------|
|                   | <i>b</i> (95% CIs)               | <i>p</i>         | <i>b</i> (95% CIs)            | <i>p</i>         | <i>b</i> (95% CIs)             | <i>p</i>         |
| Healthy Control   |                                  |                  |                               |                  |                                |                  |
| T2 vs T1          | 0.13 (-0.89, 1.15)               | 0.805            | <b>1.72 (0.69, 2.76)</b>      | <b>0.001</b>     | <b>-5.13 (-7.47, -2.79)</b>    | <b>&lt;0.001</b> |
| T3 vs T1          | 0.07 (-0.95, 1.09)               | 0.895            | <b>2.69 (1.65, 3.73)</b>      | <b>&lt;0.001</b> | <b>-12.51 (-14.85, -10.17)</b> | <b>&lt;0.001</b> |
| T3 vs T2          | -0.06 (-1.08, 0.96)              | 0.907            | 0.96 (-0.06, 1.98)            | 0.065            | <b>-7.38 (-9.67, -5.09)</b>    | <b>&lt;0.001</b> |
| Non-Treatment AUD |                                  |                  |                               |                  |                                |                  |
| T2 vs T1          | <b>-2.84 (-4.88, -0.81)</b>      | <b>0.006</b>     | <b>-2.68 (-4.62, -0.75)</b>   | <b>0.007</b>     | -2.54 (-7.00, 1.91)            | 0.263            |
| T3 vs T1          | <b>-2.56 (-4.58, -0.53)</b>      | <b>0.013</b>     | -0.17 (-2.11, 1.76)           | 0.860            | <b>-14.89 (-19.35, -10.44)</b> | <b>&lt;0.001</b> |
| T3 vs T2          | 0.29 (-1.74, 2.32)               | 0.781            | <b>2.51 (0.59, 4.43)</b>      | <b>0.011</b>     | <b>-12.35 (-16.74, -7.96)</b>  | <b>&lt;0.001</b> |
| Treatment AUD     |                                  |                  |                               |                  |                                |                  |
| T2 vs T1          | <b>-11.99 (-13.43, -10.55)</b>   | <b>&lt;0.001</b> | <b>5.51 (3.99, 7.04)</b>      | <b>&lt;0.001</b> | 1.97 (-1.76, 5.70)             | 0.300            |
| T3 vs T1          | <b>-13.76 (-15.20, -12.32)</b>   | <b>&lt;0.001</b> | <b>4.82 (3.29, 6.34)</b>      | <b>&lt;0.001</b> | -1.08 (-4.80, 2.65)            | 0.571            |
| T3 vs T2          | <b>-1.77 (-3.19, -0.34)</b>      | <b>0.015</b>     | -0.69 (-2.16, 0.77)           | 0.353            | -3.05 (-6.74, 0.64)            | 0.106            |
|                   | D. Psychological Quality of Life |                  | E. Social Quality of Life     |                  | F. Environment Quality of Life |                  |
|                   | <i>b</i> (95% CIs)               | <i>p</i>         | <i>b</i> (95% CIs)            | <i>p</i>         | <i>b</i> (95% CIs)             | <i>p</i>         |
| Healthy Control   |                                  |                  |                               |                  |                                |                  |
| T2 vs T1          | <b>-7.87 (-10.55, -5.18)</b>     | <b>&lt;0.001</b> | <b>-8.90 (-12.28, -5.52)</b>  | <b>&lt;0.001</b> | <b>-4.05 (-6.52, -1.57)</b>    | <b>0.001</b>     |
| T3 vs T1          | <b>-15.96 (-18.65, -13.28)</b>   | <b>&lt;0.001</b> | <b>-12.53 (-15.90, -9.15)</b> | <b>&lt;0.001</b> | <b>-11.27 (-13.74, -8.80)</b>  | <b>&lt;0.001</b> |
| T3 vs T2          | <b>-8.10 (-10.73, -5.47)</b>     | <b>&lt;0.001</b> | <b>-3.63 (-6.93, -0.32)</b>   | <b>0.032</b>     | <b>-7.22 (-9.64, -4.80)</b>    | <b>&lt;0.001</b> |
| Non-Treatment AUD |                                  |                  |                               |                  |                                |                  |
| T2 vs T1          | <b>-5.72 (-10.84, -0.60)</b>     | <b>0.029</b>     | -4.61 (-11.05, 1.83)          | 0.161            | 2.19 (-2.53, 6.90)             | 0.363            |
| T3 vs T1          | <b>-17.52 (-22.64, -12.41)</b>   | <b>&lt;0.001</b> | <b>-13.81 (-20.26, -7.37)</b> | <b>&lt;0.001</b> | <b>-5.76 (-10.47, -1.04)</b>   | <b>0.017</b>     |
| T3 vs T2          | <b>-11.81 (-16.85, -6.76)</b>    | <b>&lt;0.001</b> | <b>-9.20 (-15.55, -2.85)</b>  | <b>0.005</b>     | <b>-7.94 (-12.59, -3.30)</b>   | <b>&lt;0.001</b> |
| Treatment AUD     |                                  |                  |                               |                  |                                |                  |
| T2 vs T1          | <b>5.51 (1.23, 9.79)</b>         | <b>0.012</b>     | 1.62 (-3.77, 7.01)            | 0.556            | 1.64 (-2.31, 5.58)             | 0.416            |
| T3 vs T1          | 4.10 (-0.18, 8.38)               | 0.061            | 3.33 (-2.06, 8.72)            | 0.225            | -1.40 (-5.34, 2.55)            | 0.487            |
| T3 vs T2          | -1.41 (-5.65, 2.83)              | 0.515            | 1.72 (-3.62, 7.05)            | 0.529            | -3.03 (-6.94, 0.87)            | 0.128            |

Multilevel models adjusted for age, sex, race, cohort, and enrollment phase. Regression coefficients were unstandardized. The ranges of possible scores were from 0 to 40 for the Alcohol Use Disorders Identification Test, 0 to 30 for Penn Alcohol Craving Scale, 0 to 100 for each of the four World Health Organization QoL - BREF domains.
